# Supplementary material
Source: PubMed Central journal article supplement (PMC9389836)
Supplement: mmc6.pdf [file mmc6.pdf]

## **Supplemental Information:**

### **Biochemical Characterization of Emerging SARS-CoV-2 Nsp15 Endoribonuclease Variants**

Isha M. Wilson<sup>1</sup>, Meredith N. Frazier<sup>1,2\*</sup>, Jian-Liang Li<sup>3</sup>, Thomas A. Randall<sup>3</sup>, and Robin E. Stanley<sup>1†</sup>

<sup>1</sup>Signal Transduction Laboratory, National Institute of Environmental Health Sciences, National Institutes of Health, Department of Health and Human Services, 111 T. W. Alexander Drive, Research Triangle Park, NC 27709, USA

<sup>2</sup>Present address: Department of Chemistry and Biochemistry, College of Charleston, Charleston, SC, 29424, USA

<sup>3</sup>Integrative Bioinformatics Support Group, National Institute of Environmental Health Sciences, National Institutes of Health, Department of Health and Human Services, 111 T. W. Alexander Drive, Research Triangle Park, NC 27709, USA

\*Corresponding authors.

†To whom correspondence should be addressed. Tel: +1(984)287-3568; Email: [robin.stanley@nih.gov](mailto:robin.stanley@nih.gov)

#### **Supplemental Information Includes:**

Legend for Supplemental Files 1-5  
Supplemental Tables 1-2  
Supplemental Figures 1-7

### **Legend for Supplemental Files**

**Supplemental File 1.** Original GISAID download and analysis, June 15, 2021. See ReadMe tab in spreadsheet for additional information.

**Supplemental File 2.** Feb 20, 2022 GISAID download and analysis. See ReadMe tab in spreadsheet for additional information.

**Supplemental File 3.** Identification of the earliest date of origin of each of the non-synonymous Nsp15 substitutions.

GISAID accession IDs for all Nsp15 proteins that contain each substitution of interest were used to query all of the fasta headers for each Nsp15 protein in GISAID downloaded on 02/15/2022. Each worksheet is a compilation of these headers for a specific substitution of interest, sorted by the oldest date. Each column in each worksheet is a different element in each of the fasta headers for these sequences. The column headers are left in the GISAID format dictated by their upload webpage (<https://www.epicov.org/epi3/frontend#5045a9>). Column YYYY-MM-DD is the collection date for each genome and is the only date we can attach to these proteins. Based on these dates we can estimate the date and location of each of these substitutions. As some of the dates are incomplete, we are basing the date of origin only on dates that were completely provided by submitters.

**Supplemental File 4.** Raw data for the data in Supplemental Table 2.

**Supplemental File 5.** Table acknowledging the GISAID contributions of submitting and originating laboratories.

| <b>Construct</b>                      | <b>Mutation Location<br/>(domain level)</b> | <b>First created</b> |
|---------------------------------------|---------------------------------------------|----------------------|
| WT-Nsp15 (6xHis-thrombin-TEV/pet14-b) | N/A                                         | [1]                  |
| Nsp15 K13N                            | NTD                                         | This study           |
| Nsp15 K13R                            | NTD                                         | This study           |
| Nsp15 G18E                            | NTD                                         | This study           |
| Nsp15 G18R                            | NTD                                         | This study           |
| Nsp15 T34I                            | NTD                                         | This study           |
| Nsp15 A93S                            | MD                                          | This study           |
| Nsp15 T113I                           | MD                                          | This study           |
| Nsp15 T115A                           | MD                                          | This study           |
| Nsp15 V128F                           | MD                                          | This study           |
| Nsp15 D133Y                           | MD                                          | This study           |
| Nsp15 L163F                           | MD                                          | This study           |
| Nsp15 P206S                           | EndoU                                       | This study           |
| Nsp15 R207S                           | EndoU                                       | This study           |
| Nsp15 D220Y                           | EndoU                                       | This study           |
| Nsp15 H235Y                           | EndoU                                       | This study           |
| Nsp15 K260R                           | EndoU                                       | This study           |
| Nsp15 K290N                           | EndoU                                       | This study           |
| Nsp15 V321M                           | EndoU                                       | This study           |
| Nsp15 W333C                           | EndoU                                       | This study           |

**Supplemental Table 1: Plasmid Constructs used in this study.** All constructs generated by Genscript (Piscataway, NJ).

| Residue Substitution | Alleles | All        | Omicron    | Delta      | Delta/Omicron |
|----------------------|---------|------------|------------|------------|---------------|
| K13R                 | AG      | 0.00022722 | 0.00000725 | 0.00004861 | 6.703142054   |
| K13N                 | GC      | 0.00000381 | 0.00000242 | 0.00000351 | 1.450199002   |
| K13N                 | GT      | 0.00080130 | 0.00006816 | 0.00121778 | 17.86521749   |
| G18R                 | GA      | 0.00037332 | 0.00001257 | 0.00069664 | 55.42363109   |
| G18R                 | GC      | 0.00000229 | 0.00000048 | 0.00000397 | 8.217794345   |
| G18E                 | GA      | 0.00030400 | 0.00002395 | 0.00058364 | 24.37424752   |
| T34I                 | CT      | 0.00177838 | 0.00011589 | 0.00114276 | 9.860321698   |
| A93S                 | GT      | 0.00015042 | 0.00000287 | 0.00005678 | 19.75894765   |
| T115A                | AG      | 0.00086410 | 0.00001006 | 0.00136916 | 136.1404271   |
| V128F                | GT      | 0.00172299 | 0.00108040 | 0.00160257 | 1.483305117   |
| D133Y                | GT      | 0.00083478 | 0.00001772 | 0.00125023 | 70.5573099    |
| L163F                | CT      | 0.00127986 | 0.00036301 | 0.00186168 | 5.128482846   |
| P206S                | CT      | 0.00202981 | 0.00029213 | 0.00199766 | 6.838251464   |
| R207S                | GC      | 0.00000152 | 0.00000000 | 0.00000187 | NA            |
| R207S                | GT      | 0.00095044 | 0.00002251 | 0.00053294 | 23.67752014   |
| D220Y                | GT      | 0.00174677 | 0.00004023 | 0.00081121 | 20.16551036   |
| H235Y                | CT      | 0.00242754 | 0.00061970 | 0.00391448 | 6.316740301   |
| K260R                | AG      | 0.00298775 | 0.00002586 | 0.00427359 | 165.2541891   |
| K290N                | .C      | 0.00000022 | 0.00000000 | 0.00000000 | NA            |
| K290N                | .T      | 0.00000033 | 0.00000000 | 0.00000000 | NA            |
| K290N                | GC      | 0.00000163 | 0.00000048 | 0.00000210 | 4.350597006   |
| K290N                | GT      | 0.00018909 | 0.00005555 | 0.00023411 | 4.214232768   |
| W333C                | GC      | 0.00000033 | 0.00000000 | 0.00000023 | NA            |
| W333C                | GT      | 0.00027989 | 0.00001772 | 0.00047780 | 26.96499696   |

**Supplemental Table 2: The frequency of occurrence of each non-synonymous Nsp15 substitution in the Delta and Omicron variants of concern.** GISAID accession IDs for each of the genomes containing a substitution listed in the Residue Substitution column were used to search the Custom Download page (<https://www.epicov.org/epi3/frontend#4fa597>) using the Select function. Prior to the search, the “Variant” selector was used to limit the search to either VOC Omicron, VOC Delta, or all variants. All is the frequency of each substitution in all SARS CoV2 genomes in GISAID; Delta is the frequency of each substitution in the Delta subset of SARS CoV2 genomes; Omicron is the frequency of each substitution in the Omicron subset of SARS CoV2 genomes. Delta/Omicron is the ratio of the count of each substitution in each of the two VOC. For raw data see Supplemental File Four.



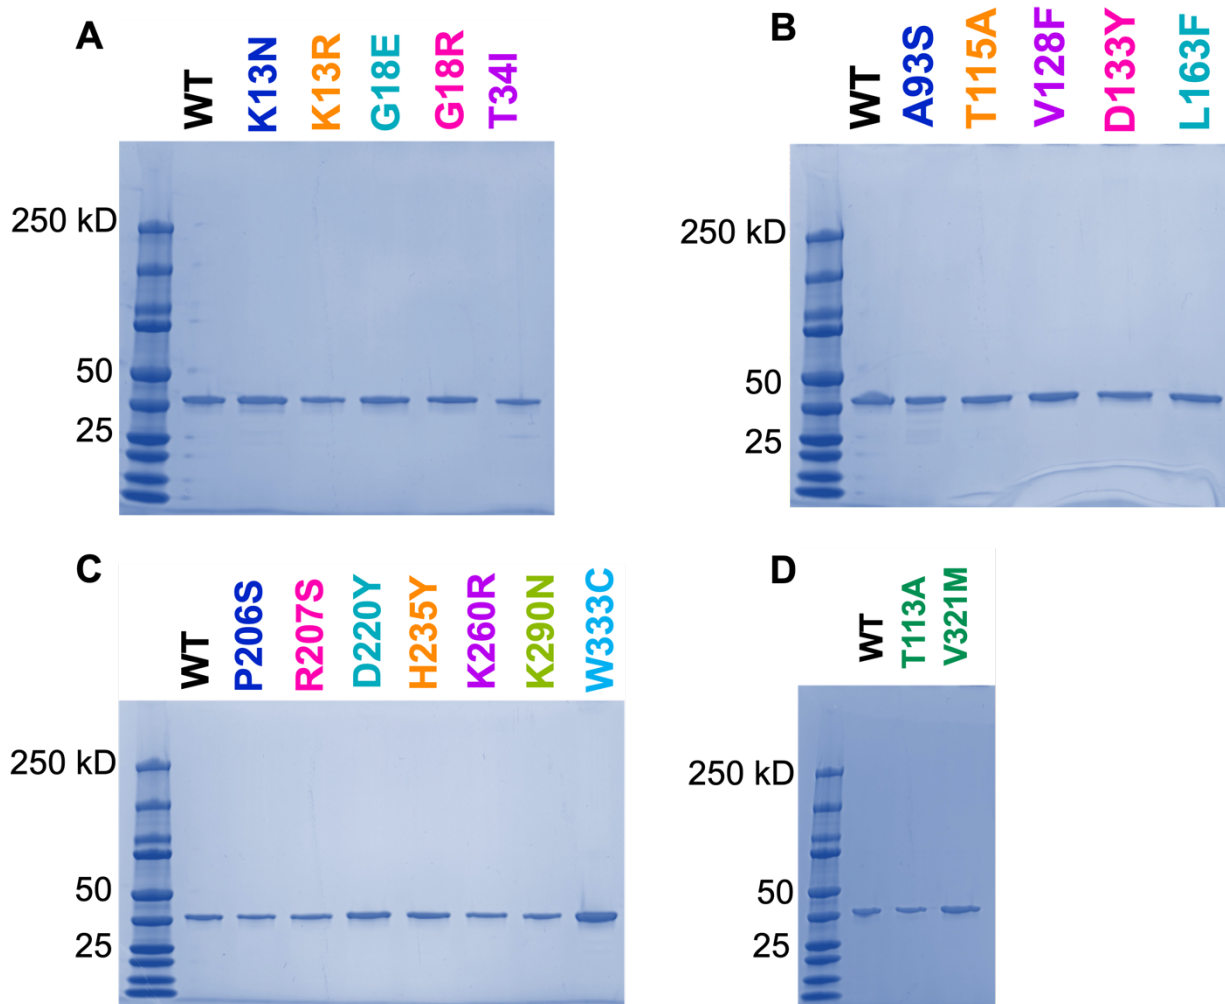

**Supplemental Figure 1: Summary gels following purification of all Nsp15 variants.** Fractions corresponding to active hexamer were analyzed by SDS-PAGE and reveal pure protein for NTD (A), MD (B), and EndoU (C) variants. (D) shows the final purification of two mutants added to this study during revisions, T113I (MD) and V321M (EndoU).

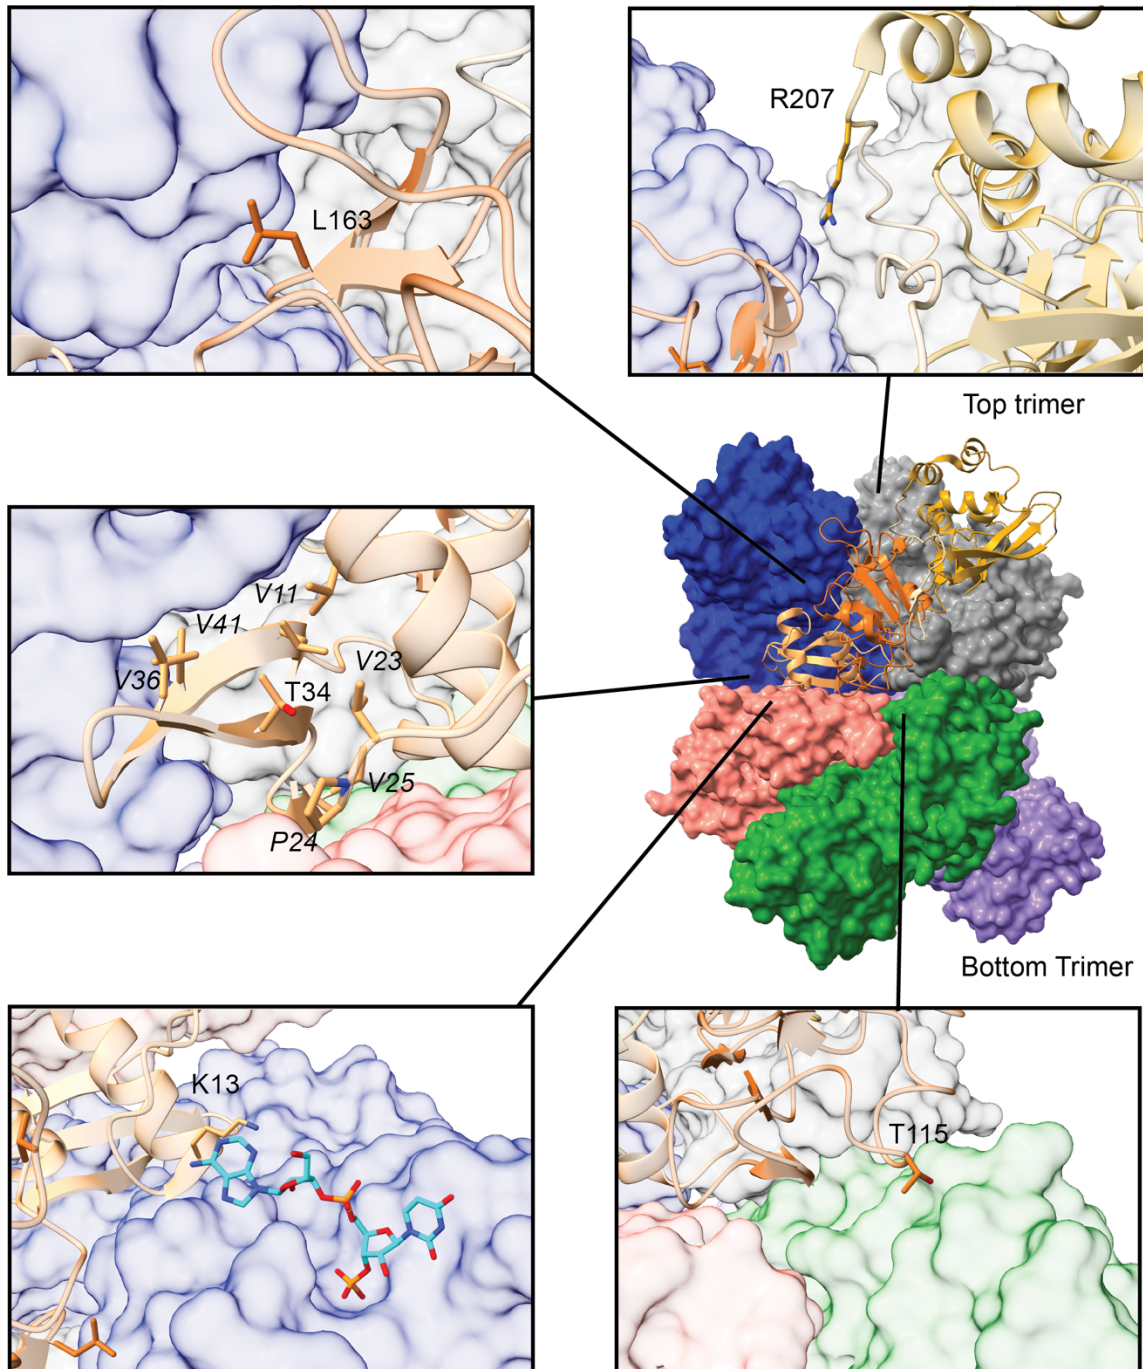

**Supplemental Figure 2: Selected residues involved in hexamer interface interactions.** Center right: Nsp15 hexamer (PDB: 7N06). Five protomers shown in surface view (blue, grey, salmon, green, purple); one protomer shown in ribbon view and colored by domain (NTD, tan; MD, orange; EndoU, gold). Boxes depict zoomed in regions with residues of interest. From top right, counter-clockwise: EndoU residue R207, MD residue L163, NTD residue T34 with surrounding core residues labeled in italics, NTD residue K13, and MD residue T115. K13 is shown with a post-cleavage RNA; the 5' base extends towards the neighboring NTD including K13.

Fl.U<sub>1</sub>.C<sub>2</sub>.A<sub>3</sub>.U<sub>4</sub>.C<sub>5</sub>.U<sub>6</sub>.A<sub>7</sub>.A<sub>8</sub>.A<sub>9</sub>.C<sub>10</sub>.G<sub>11</sub>.A<sub>12</sub>.A<sub>13</sub>.C<sub>14</sub>.A<sub>15</sub>.A<sub>16</sub>.A<sub>17</sub>.C<sub>18</sub>.U<sub>19</sub>.A<sub>20</sub>.A<sub>21</sub>.A<sub>22</sub>.A<sub>23</sub>.Cy5

| TRS-N |    | WT | WT + TRS-N |   |   |    |    | T34I | T34I + TRS-N |   |   |    |    |
|-------|----|----|------------|---|---|----|----|------|--------------|---|---|----|----|
| OH    | 30 |    | 0          | 1 | 5 | 10 | 30 |      | 0            | 1 | 5 | 10 | 30 |

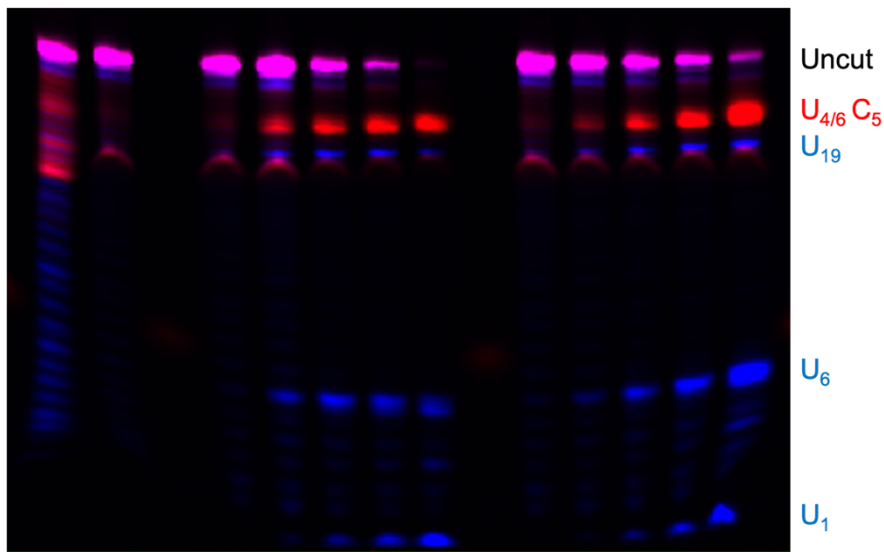

| TRS-N |    | K13R | K13R + TRS-N |   |   |    |    | K13N | K13N + TRS-N |   |   |    |    |
|-------|----|------|--------------|---|---|----|----|------|--------------|---|---|----|----|
| OH    | 30 |      | 0            | 1 | 5 | 10 | 30 |      | 0            | 1 | 5 | 10 | 30 |

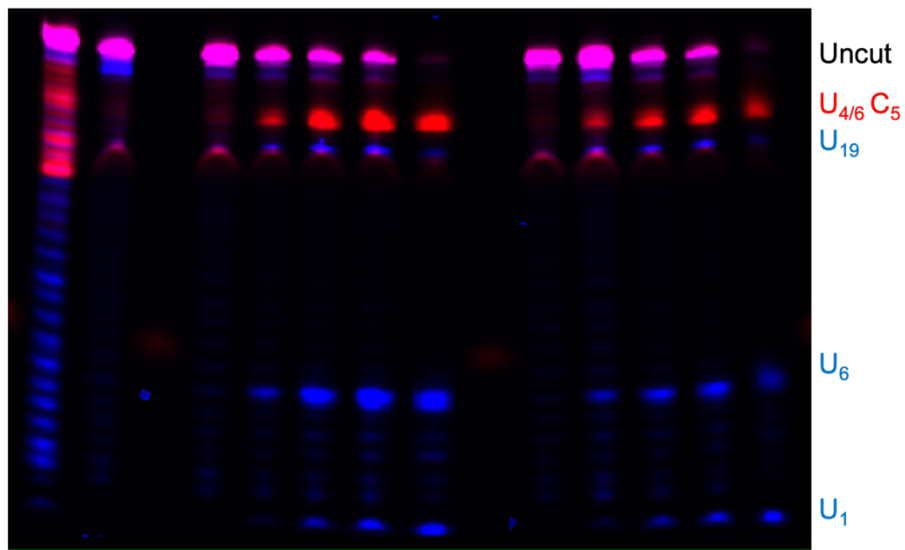

Fl.U<sub>1</sub>.C<sub>2</sub>.A<sub>3</sub>.U<sub>4</sub>.C<sub>5</sub>.U<sub>6</sub>.A<sub>7</sub>.A<sub>8</sub>.A<sub>9</sub>.C<sub>10</sub>.G<sub>11</sub>.A<sub>12</sub>.A<sub>13</sub>.C<sub>14</sub>.A<sub>15</sub>.A<sub>16</sub>.A<sub>17</sub>.C<sub>18</sub>.U<sub>19</sub>.A<sub>20</sub>.A<sub>21</sub>.A<sub>22</sub>.A<sub>23</sub>.Cy5

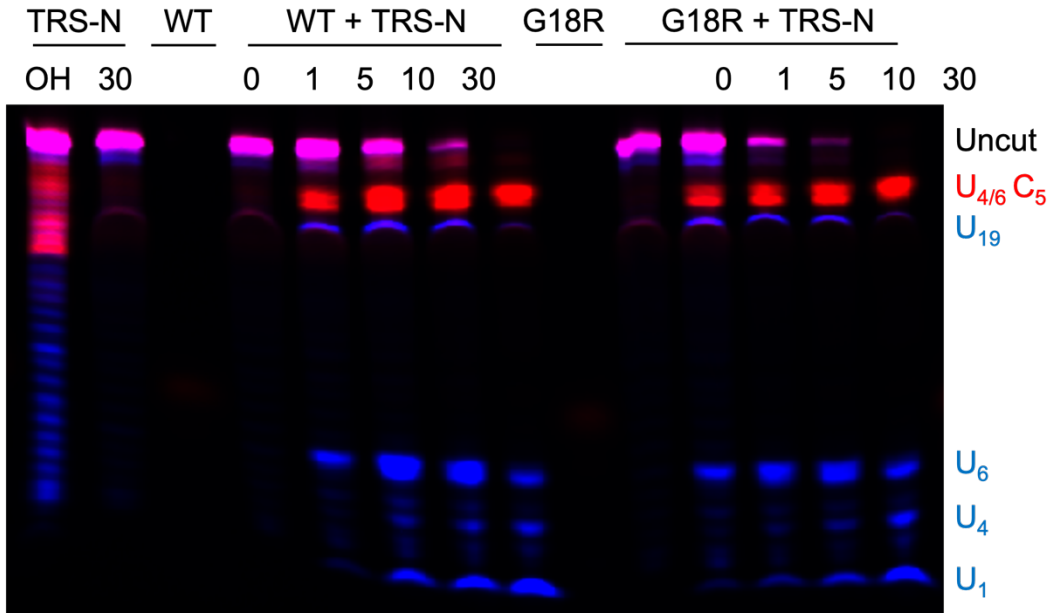

| TRS-N |    | G18E | G18E + TRS-N |   |   |    |    | V128F | V128F + TRS-N |   |   |    |        |
|-------|----|------|--------------|---|---|----|----|-------|---------------|---|---|----|--------|
| OH    | 30 |      | 0            | 1 | 5 | 10 | 30 |       | 0             | 1 | 5 | 10 | 30 min |

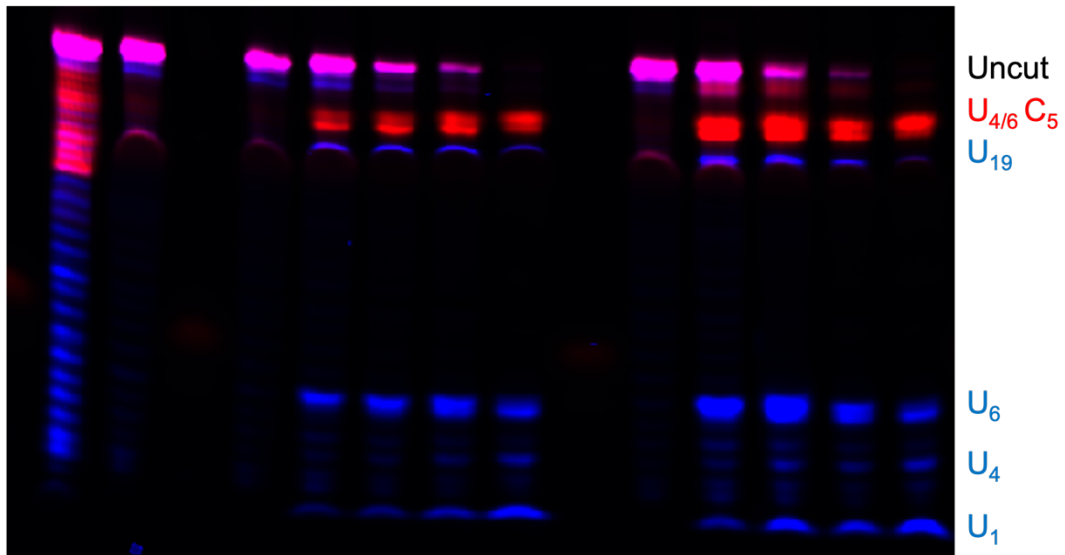

**Supplemental Figure 3: Gel-based endonuclease assays for NTD/MD mutants.** The transcriptional regulatory sequence for the nucleocapsid protein (TRS-N) is fluorescently labeled on both end (see labeled sequence at top of each set of gels). A 30-min time course nuclease assay was carried out with WT or Nsp15 NTD/MD variants.

Fl.U<sub>1</sub>.C<sub>2</sub>.A<sub>3</sub>.U<sub>4</sub>.C<sub>5</sub>.U<sub>6</sub>.A<sub>7</sub>.A<sub>8</sub>.A<sub>9</sub>.C<sub>10</sub>.G<sub>11</sub>.A<sub>12</sub>.A<sub>13</sub>.C<sub>14</sub>.A<sub>15</sub>.A<sub>16</sub>.A<sub>17</sub>.C<sub>18</sub>.U<sub>19</sub>.A<sub>20</sub>.A<sub>21</sub>.A<sub>22</sub>.A<sub>23</sub>.Cy5

| TRS-N |    | WT | WT + TRS-N |   |   |    |    | A93S | A93S + TRS-N |   |   |    |    |
|-------|----|----|------------|---|---|----|----|------|--------------|---|---|----|----|
| OH    | 30 |    | 0          | 1 | 5 | 10 | 30 |      | 0            | 1 | 5 | 10 | 30 |

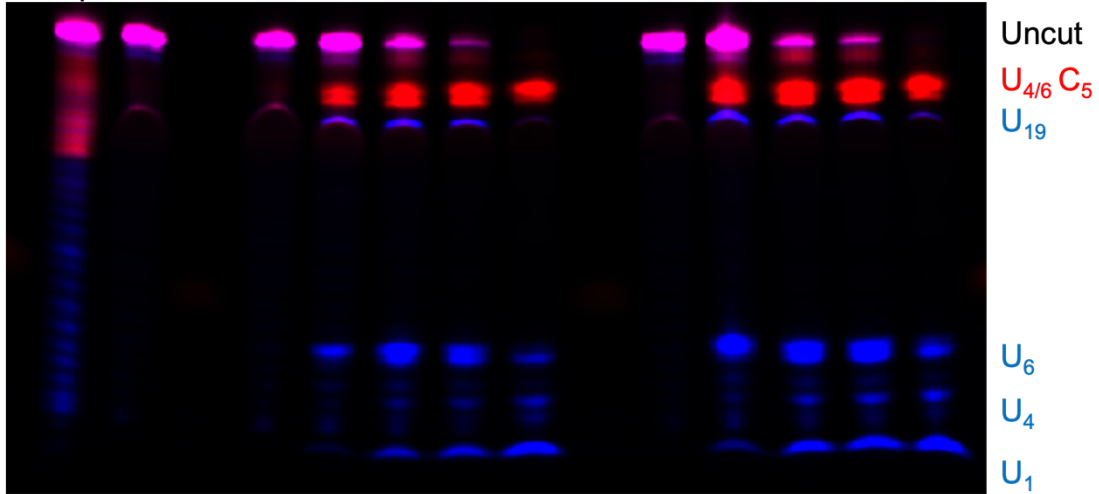

| TRS-N |    | T115A | T115A + TRS-N |   |   |    |    | D133Y | D133Y + TRS-N |   |   |    |        |
|-------|----|-------|---------------|---|---|----|----|-------|---------------|---|---|----|--------|
| OH    | 30 |       | 0             | 1 | 5 | 10 | 30 |       | 0             | 1 | 5 | 10 | 30 min |

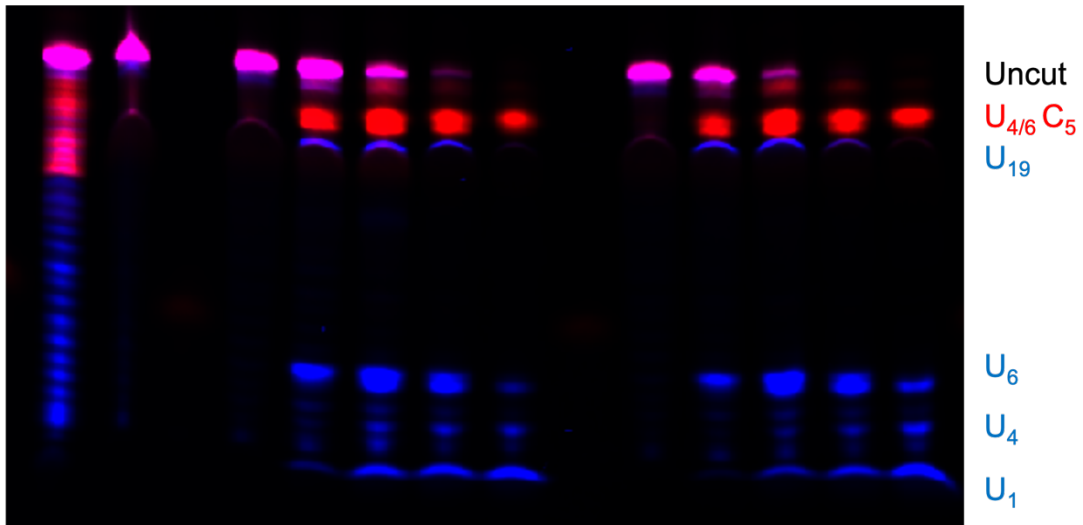



Fl.U<sub>1</sub>.C<sub>2</sub>.A<sub>3</sub>.U<sub>4</sub>.C<sub>5</sub>.U<sub>6</sub>.A<sub>7</sub>.A<sub>8</sub>.A<sub>9</sub>.C<sub>10</sub>.G<sub>11</sub>.A<sub>12</sub>.A<sub>13</sub>.C<sub>14</sub>.A<sub>15</sub>.A<sub>16</sub>.A<sub>17</sub>.C<sub>18</sub>.U<sub>19</sub>.A<sub>20</sub>.A<sub>21</sub>.A<sub>22</sub>.A<sub>23</sub>.Cy5

| TRS-N |    | WT | WT + TRS-N |   |   |    |    | L163F | L163F + TRS-N |   |   |    |    |
|-------|----|----|------------|---|---|----|----|-------|---------------|---|---|----|----|
| OH    | 30 |    | 0          | 1 | 5 | 10 | 30 |       | 0             | 1 | 5 | 10 | 30 |

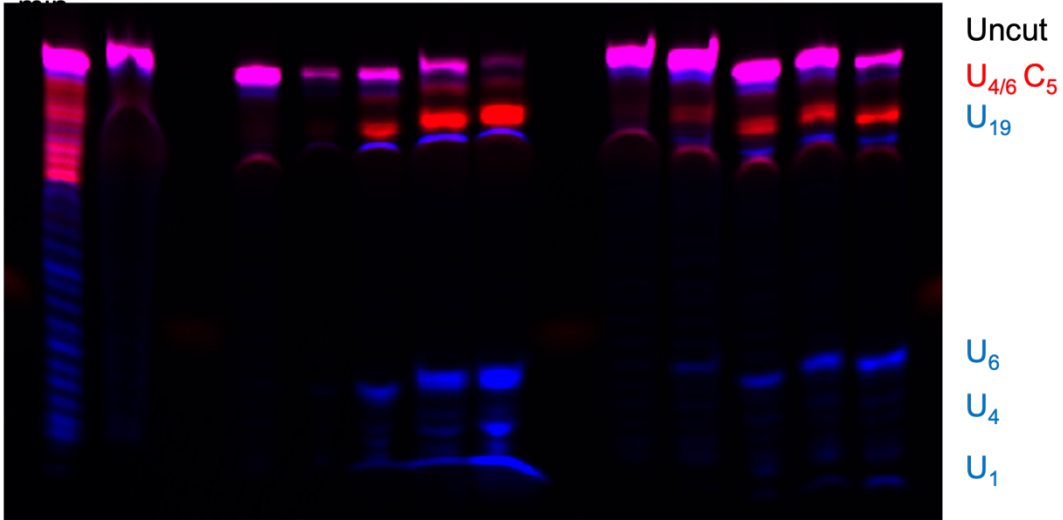

| TRS-N |    | T113I | T113I + TRS-N |   |   |    |        |
|-------|----|-------|---------------|---|---|----|--------|
| OH    | 30 |       | 0             | 1 | 5 | 10 | 30 min |

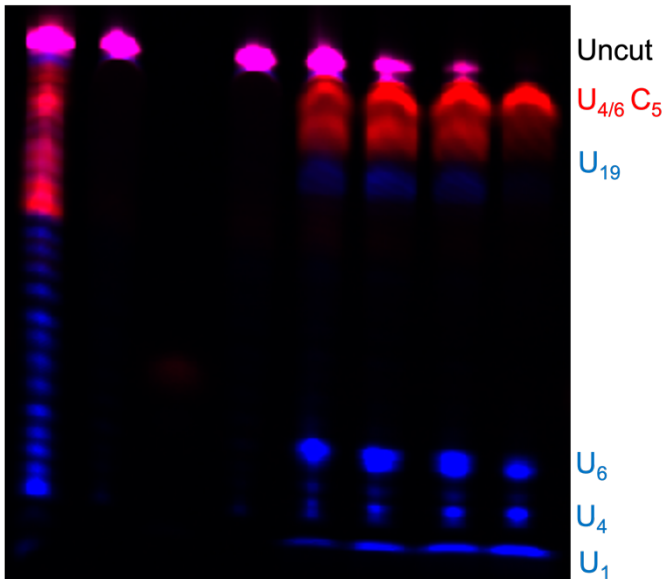

**Supplemental Figure 4: Gel-based endonuclease assays for MD mutants.** The transcriptional regulatory sequence for the nucleocapsid protein (TRS-N) is fluorescently labeled on both end (see labeled sequence at top of each set of gels). A 30-min time course nuclease assay was carried out with WT or Nsp15 MD variants.

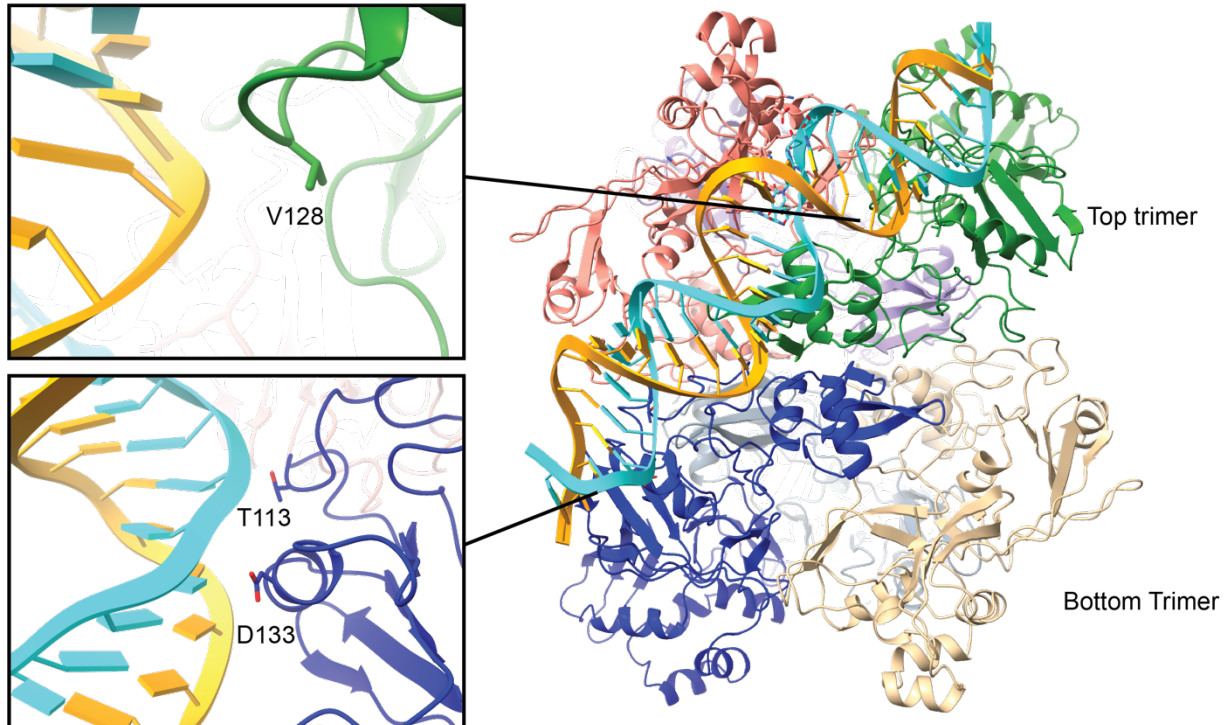

**Supplemental Figure 5: Selected residues involved in dsRNA platform[2].** Right: Nsp15-dsRNA structure (PDB ID: 7TQV). Left: zoomed-in regions highlighting non-active site Nsp15 variants in this study that support binding of dsRNA. Nsp15 V128 contributes from the top trimer, while T113 and D133 contribute from the bottom trimer.

Fl.U<sub>1</sub>.C<sub>2</sub>.A<sub>3</sub>.U<sub>4</sub>.C<sub>5</sub>.U<sub>6</sub>.A<sub>7</sub>.A<sub>8</sub>.A<sub>9</sub>.C<sub>10</sub>.G<sub>11</sub>.A<sub>12</sub>.A<sub>13</sub>.C<sub>14</sub>.A<sub>15</sub>.A<sub>16</sub>.A<sub>17</sub>.C<sub>18</sub>.U<sub>19</sub>.A<sub>20</sub>.A<sub>21</sub>.A<sub>22</sub>.A<sub>23</sub>.Cy5

| TRS-N |    | D220Y |   |   |    |    | D220Y + TRS-N |   |   |    |    | R207S |   | R207S + TRS-N |    |    |  |  |
|-------|----|-------|---|---|----|----|---------------|---|---|----|----|-------|---|---------------|----|----|--|--|
| OH    | 30 | 0     | 1 | 5 | 10 | 30 | 0             | 1 | 5 | 10 | 30 | 0     | 1 | 5             | 10 | 30 |  |  |

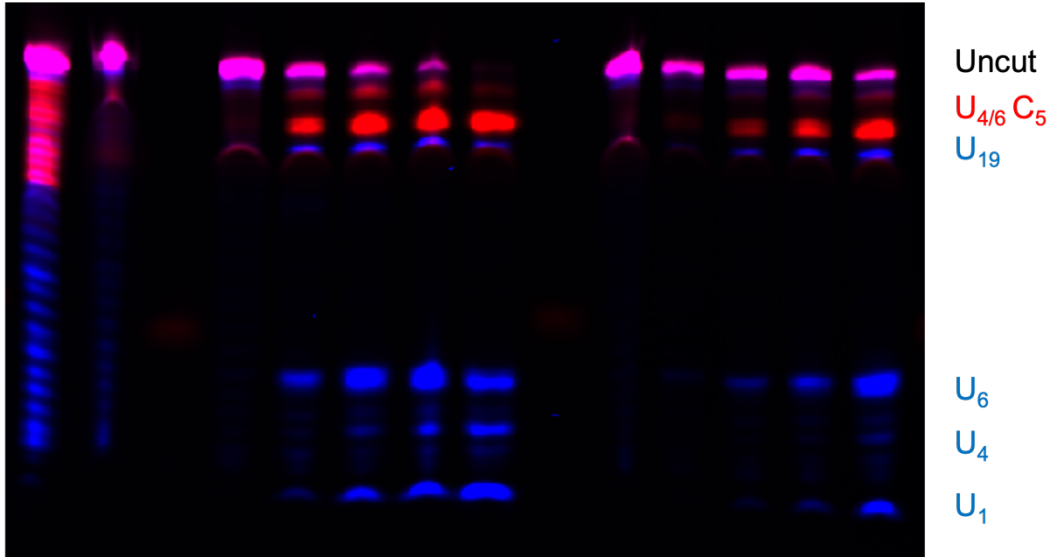

| TRS-N |    | WT | WT + TRS-N |   |   |    |    | P206S |   | P206S + TRS-N |   |    |        |  |
|-------|----|----|------------|---|---|----|----|-------|---|---------------|---|----|--------|--|
| OH    | 30 |    | 0          | 1 | 5 | 10 | 30 |       | 0 | 1             | 5 | 10 | 30 min |  |

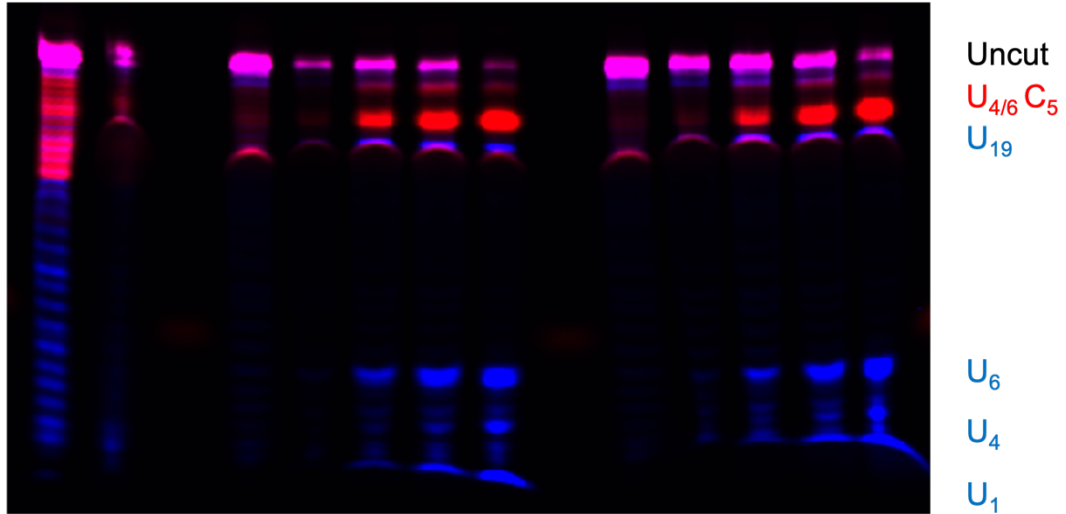



Fl.U<sub>1</sub>.C<sub>2</sub>.A<sub>3</sub>.U<sub>4</sub>.C<sub>5</sub>.U<sub>6</sub>.A<sub>7</sub>.A<sub>8</sub>.A<sub>9</sub>.C<sub>10</sub>.G<sub>11</sub>.A<sub>12</sub>.A<sub>13</sub>.C<sub>14</sub>.A<sub>15</sub>.A<sub>16</sub>.A<sub>17</sub>.C<sub>18</sub>.U<sub>19</sub>.A<sub>20</sub>.A<sub>21</sub>.A<sub>22</sub>.A<sub>23</sub>.Cy5

| TRS-N |    | H235Y |   |   |    |    | H235Y + TRS-N |   |   |    |    | K290N |   | K290N + TRS-N |    |    |  |  |
|-------|----|-------|---|---|----|----|---------------|---|---|----|----|-------|---|---------------|----|----|--|--|
| OH    | 30 | 0     | 1 | 5 | 10 | 30 | 0             | 1 | 5 | 10 | 30 | 0     | 1 | 5             | 10 | 30 |  |  |

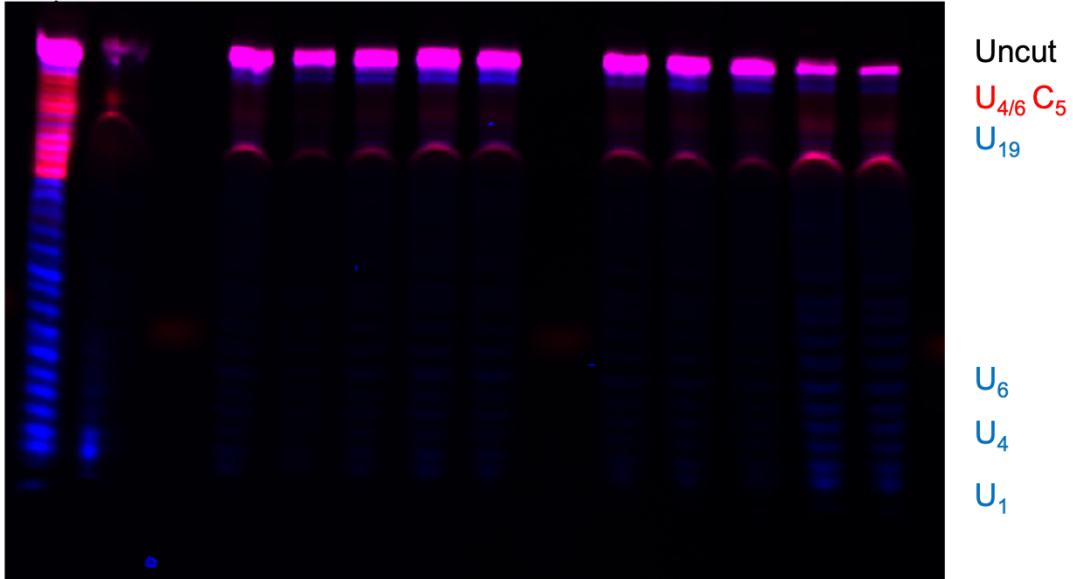

| TRS-N |    | W333C |   |   |    |    | W333C + TRS-N |   |   |    |    | K260R |   | K260R + TRS-N |    |    |  |  |
|-------|----|-------|---|---|----|----|---------------|---|---|----|----|-------|---|---------------|----|----|--|--|
| OH    | 30 | 0     | 1 | 5 | 10 | 30 | 0             | 1 | 5 | 10 | 30 | 0     | 1 | 5             | 10 | 30 |  |  |

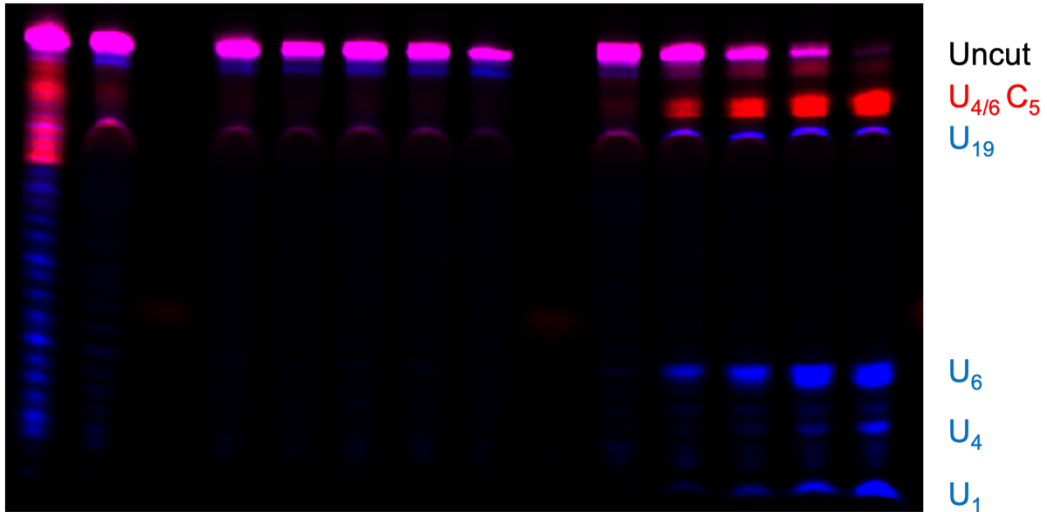

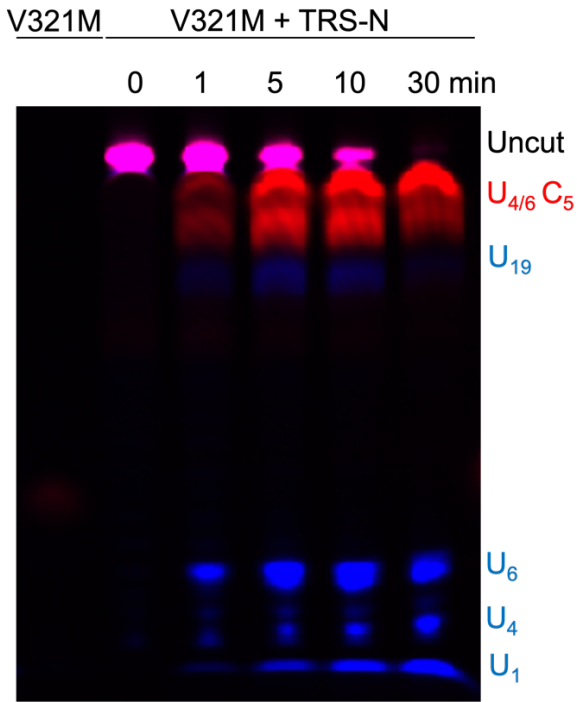

**Supplemental Figure 6: Gel-based endonuclease assays for EndoU mutants.** The transcriptional regulatory sequence for the nucleocapsid protein (TRS-N) is fluorescently labeled on both end (see labeled sequence at top of each set of gels). A 30-min time course nuclease assay was carried out with WT or Nsp15 EndoU variants.

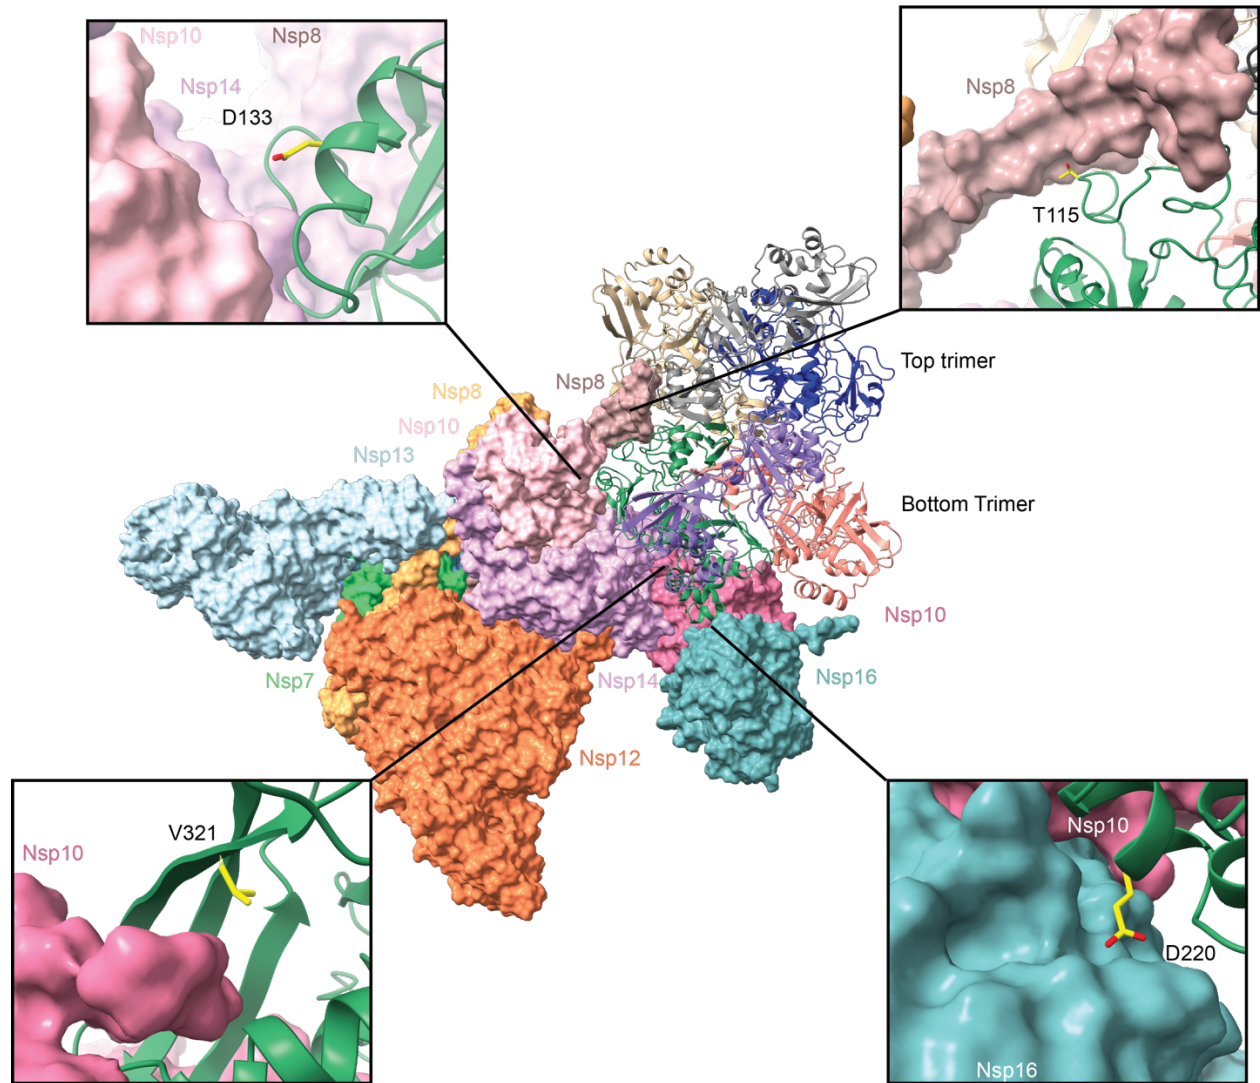

**Supplemental Figure 7: Selected residues involved in the RTC scaffolding model of Nsp15.** The RTC computational model files were downloaded from the Supplementary Information of Perry *et al.*[3] One-sixth of the RTC components are shown in surface format, with the Nsp15 hexamer in ribbon. Boxes highlight zoomed-in regions of Nsp15 variants analyzed in this paper. Clockwise, from top left: D133 faces Nsp10, T115 sits in a pocket on the surface of Nsp8, D220 extends towards Nsp16, V321 lies near Nsp10 at the opposite end from its interaction with Nsp16.

### **Supplemental References:**

[1] Pillon MC, Frazier MN, Dillard LB, Williams JG, Kocaman S, Krahn JM, et al. Cryo-EM structures of the SARS-CoV-2 endoribonuclease Nsp15 reveal insight into nuclease specificity and dynamics. *Nat Commun.* 2021;12:636.

[2] Frazier MN, Wilson IM, Krahn JM, Butay KJ, Dillard LB, Borgnia MJ, et al. Flipped Over U: Structural Basis for dsRNA Cleavage by the SARS-CoV-2 Endoribonuclease. *bioRxiv.* 2022.

[3] Perry JK, Appleby TC, Bilello JP, Feng JY, Schmitz U, Campbell EA. An atomistic model of the coronavirus replication-transcription complex as a hexamer assembled around nsp15. *J Biol Chem.* 2021;297:101218.
